# Supplementary material for: Fabrication of Anisotropic Cu Ferrite-Polymer Core-Shell Nanoparticles for Photodynamic Ablation of Cervical Cancer Cells
Source: PubMed Central journal article supplement (PMC7761902; doi:10.3390/nano10122429), 2020-12-04
Supplement: nanomaterials-10-02429-s001.pdf [file nanomaterials-10-02429-s001.pdf]

## Supplementary Information

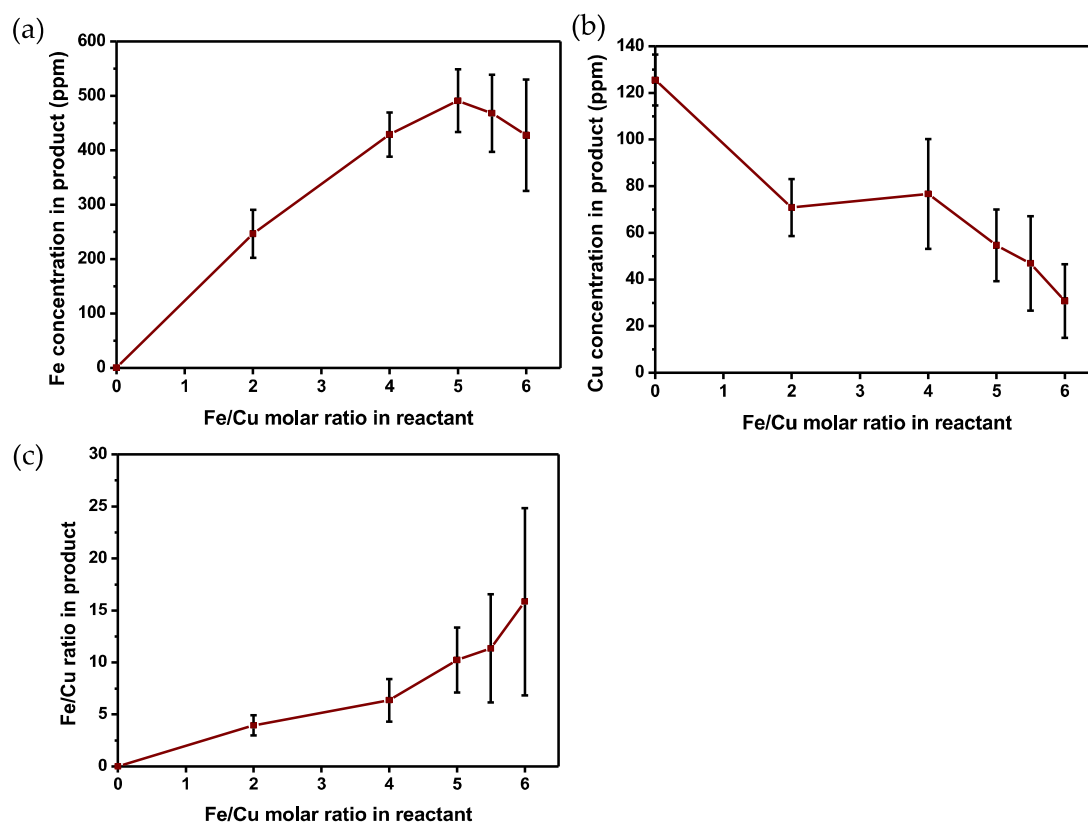

Figure S1. Metal ratio and UV-Vis spectrum of CuFeNPs. (a) Fe concentration of CuFeNPs. (n = 8) (b) Cu concentration of CuFeNPs. (n = 8) (c) Fe/Cu ratio of CuFeNPs. (n = 8)

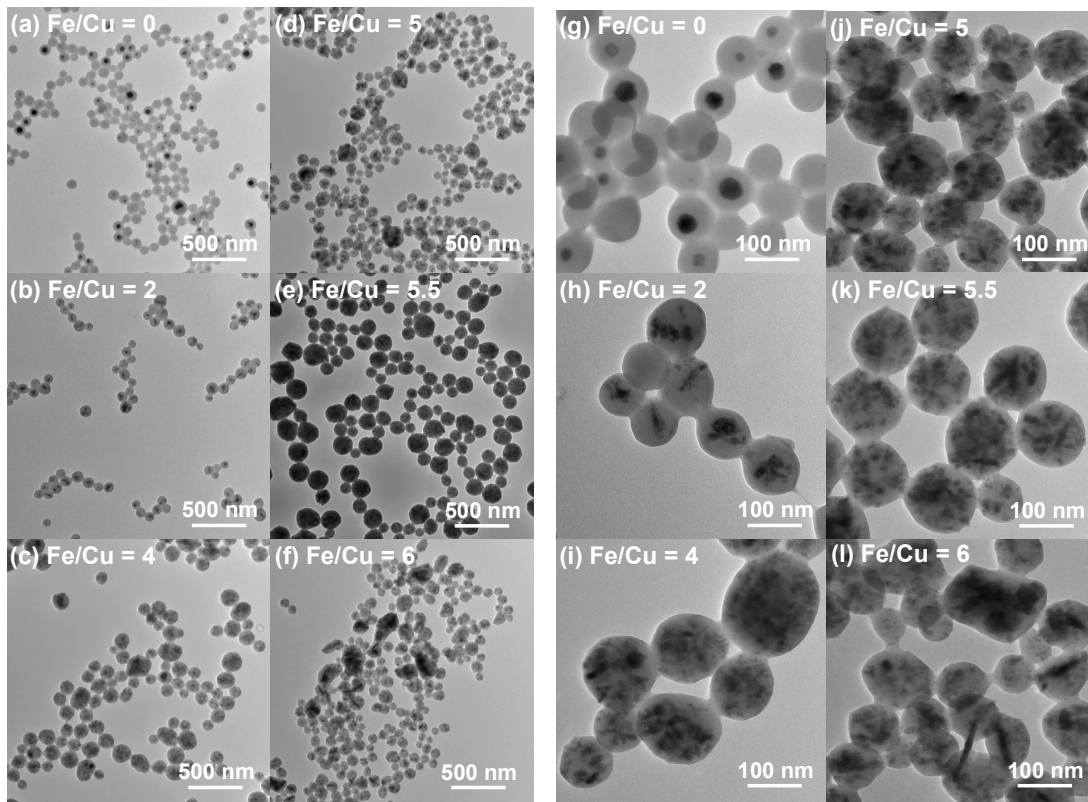

Figure S2. TEM images of CuFeNPs with different metal ratios. Scale bar: (a–f) 500 nm, (g–l) 100 nm.

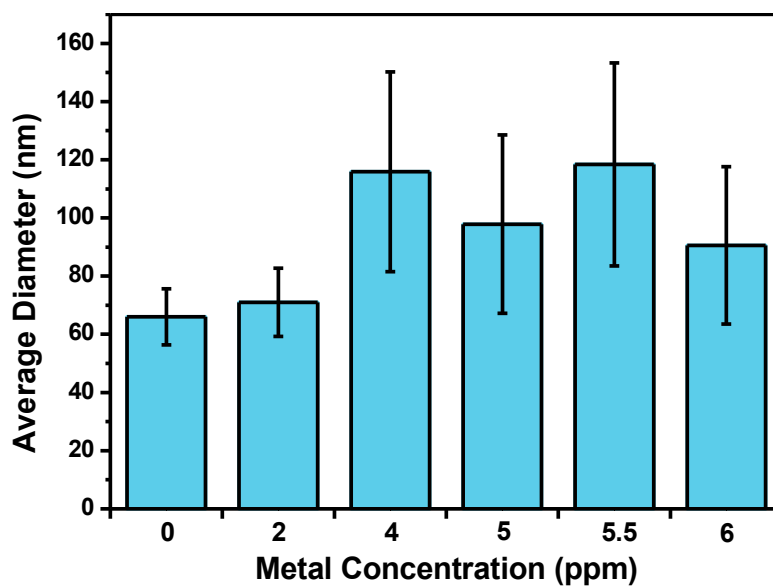

Figure S3. Statistics of the average diameter of CuFeNPs with different metal ratios.

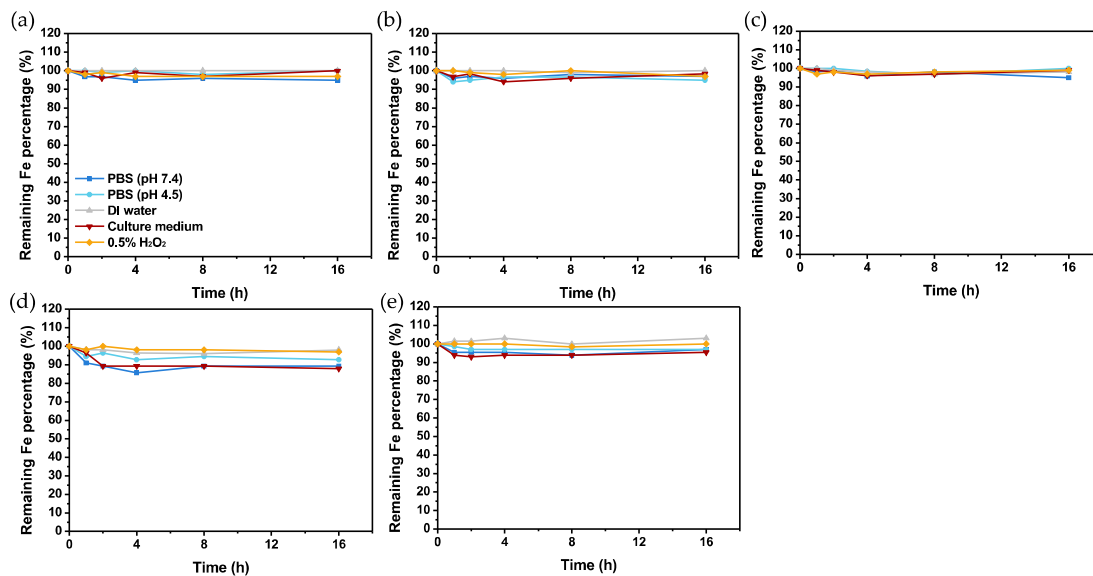

Figure S4. Relative remaining Fe of CuFeNPs after 16 h dispersion in different solvents at 25°C. (ae) Fe/Cu ratio at 2, 4, 5, 5.5 and 6, respectively.

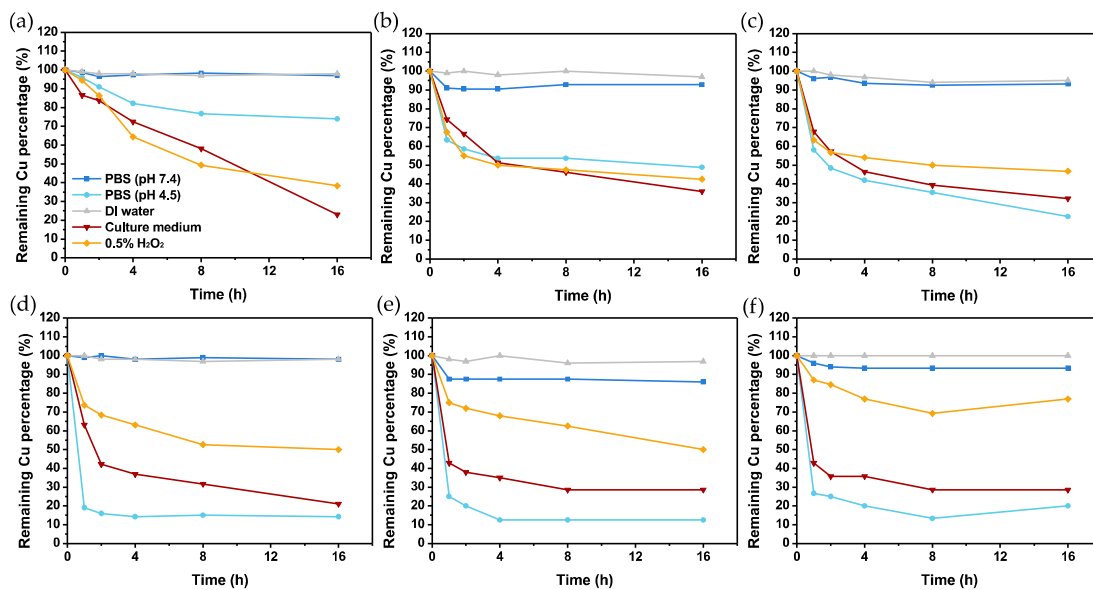

Figure S5. Relative remaining Cu of CuFeNPs after 16 h dispersion in different solvents at 25°C. (a-f) Fe/Cu ratio at 0, 2, 4, 5, 5.5 and 6, respectively.

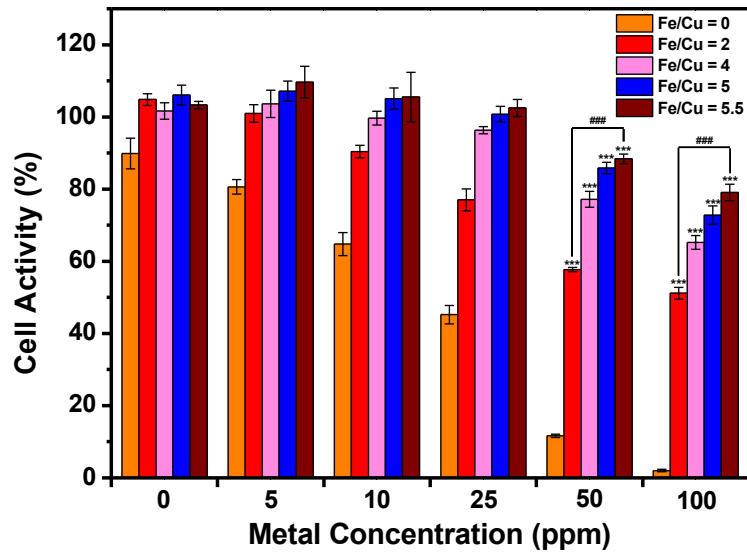

Figure S6. Cell activity of HeLa cells after 24 h co-incubation with CuFeNPs. (n = 4. \*\*\*:  $p < 0.001$ , compared to Fe/Cu = 0. ###:  $p < 0.001$ , compared between Fe/Cu = 2 and 5.5.)

Table S1. Formula of synthesis of CuFeNPs.

| Chemical                      | Concentration | Fe/Cu ratio of reactant |          |         |        |
|-------------------------------|---------------|-------------------------|----------|---------|--------|
|                               |               | 0                       | 0.25     | 0.5     | 1      |
| PSMA                          | 240 mg/mL     | 2.5 mL                  | 2.5 mL   | 2.5 mL  | 2.5 mL |
| DI water                      | -             | 7.5 mL                  | 7.375 mL | 7.25 mL | 7 mL   |
| CuCl <sub>2</sub>             | 5 mM          | 1 mL                    | 1 mL     | 1 mL    | 1 mL   |
| FeCl <sub>2</sub>             | 10 mM         | 0 mL                    | 0.125 mL | 0.25 mL | 0.5 mL |
| HCl                           | 2 M           | 18 μL                   | 18 μL    | 18 μL   | 18 μL  |
| N <sub>2</sub> H <sub>4</sub> | 64%           | 100 μL                  | 100 μL   | 100 μL  | 100 μL |

Table S1. Formula of synthesis of CuFeNPs. (cont'd)

| Chemical                      | Concentration | Fe/Cu ratio of reactant |        |        |         |        |
|-------------------------------|---------------|-------------------------|--------|--------|---------|--------|
|                               |               | 2                       | 4      | 5      | 5.5     | 6      |
| PSMA                          | 240 mg/mL     | 2.5 mL                  | 2.5 mL | 2.5 mL | 2.5 mL  | 2.5 mL |
| DI water                      | -             | 6.5 mL                  | 5.5 mL | 5 mL   | 4.75 mL | 4.5 mL |
| CuCl <sub>2</sub>             | 5 mM          | 1 mL                    | 1 mL   | 1 mL   | 1 mL    | 1 mL   |
| FeCl <sub>2</sub>             | 10 mM         | 1 mL                    | 2 mL   | 2.5 mL | 2.75 mL | 3 mL   |
| HCl                           | 2 M           | 18 μL                   | 18 μL  | 18 μL  | 18 μL   | 18 μL  |
| N <sub>2</sub> H <sub>4</sub> | 64%           | 100 μL                  | 100 μL | 100 μL | 100 μL  | 100 μL |

Table S2. Hydrodynamic diameter and zeta potential of CuFeNPs. (n=3)

| Fe/Cu ratio | Average hydrodynamic diameter (nm) | PdI   | Average zeta potential (mV) |
|-------------|------------------------------------|-------|-----------------------------|
| 0           | 102.17 ± 0.66                      | 0.052 | -30.27 ± 0.37               |
| 2           | 174.37 ± 1.03                      | 0.037 | -33.13 ± 0.31               |
| 4           | 148.97 ± 1.56                      | 0.056 | -33.87 ± 0.97               |
| 5           | 162.00 ± 1.64                      | 0.054 | -31.70 ± 0.57               |
| 5.5         | 143.70 ± 1.07                      | 0.074 | -29.30 ± 0.28               |
